# Supplementary material for: Arsenic Concentrations and Dietary Exposure in Rice-Based Infant Food in Australia
Source: PubMed Central journal article supplement (PMC7014030; doi:10.3390/ijerph17020415), 2020-01-08
Supplement: ijerph-17-00415-s001.pdf [file ijerph-17-00415-s001.pdf]

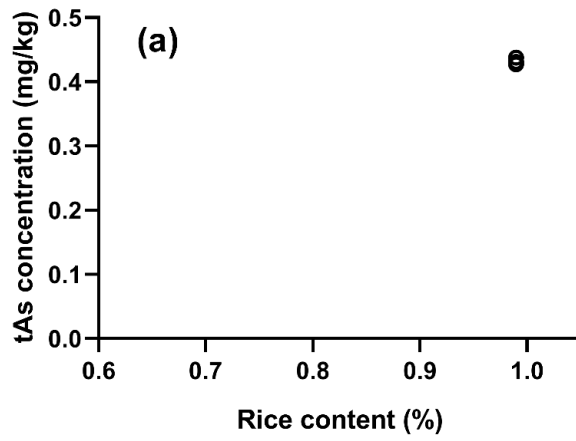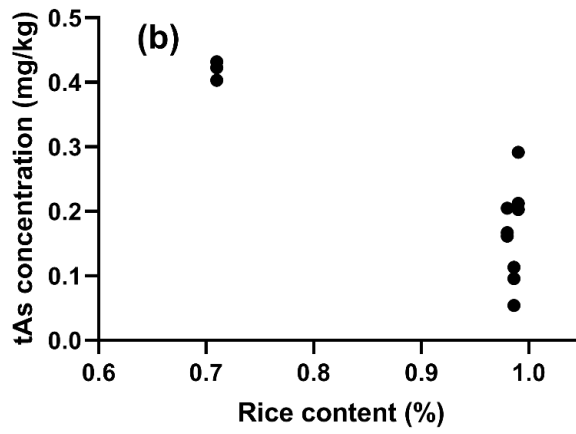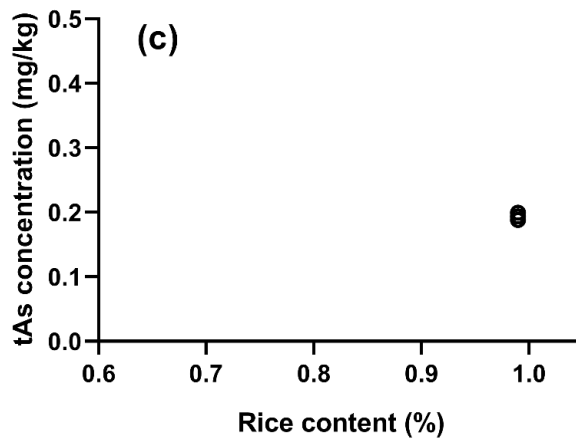

Figure S1: Relationship between total arsenic (tAs) concentration and the proportion of rice in (a) infant rice milk; (b) infant rice cereal; (c) infant rice pasta.
